# Supplementary material for: Bright yellow fluorescent N-doped Ti3C2 MXene quantum dots as an “on/off/on” nanoprobe for selective As3+ ion detection
Source: Royal Society of Chemistry journal article supplement (doi:10.1039/d4nr04139a), 2025-01-01
Supplement: d4nr04139a1.pdf [file d4nr04139a1.pdf]

## Electronic supplementary information

### Bright yellow fluorescent N-doped $\text{Ti}_3\text{C}_2$ MXene quantum dots as “on/off/on” nanoprobe for selective $\text{As}^{3+}$ ion detection

Santanu Bera and Susanta Kumar Bhunia\*

Department of Chemistry, School of Advanced Sciences, Vellore Institute of Technology, Vellore 632014, India

Corresponding author email: [susanta.bhunia@vit.ac.in](mailto:susanta.bhunia@vit.ac.in) ; [susanta.chem@gmail.com](mailto:susanta.chem@gmail.com)

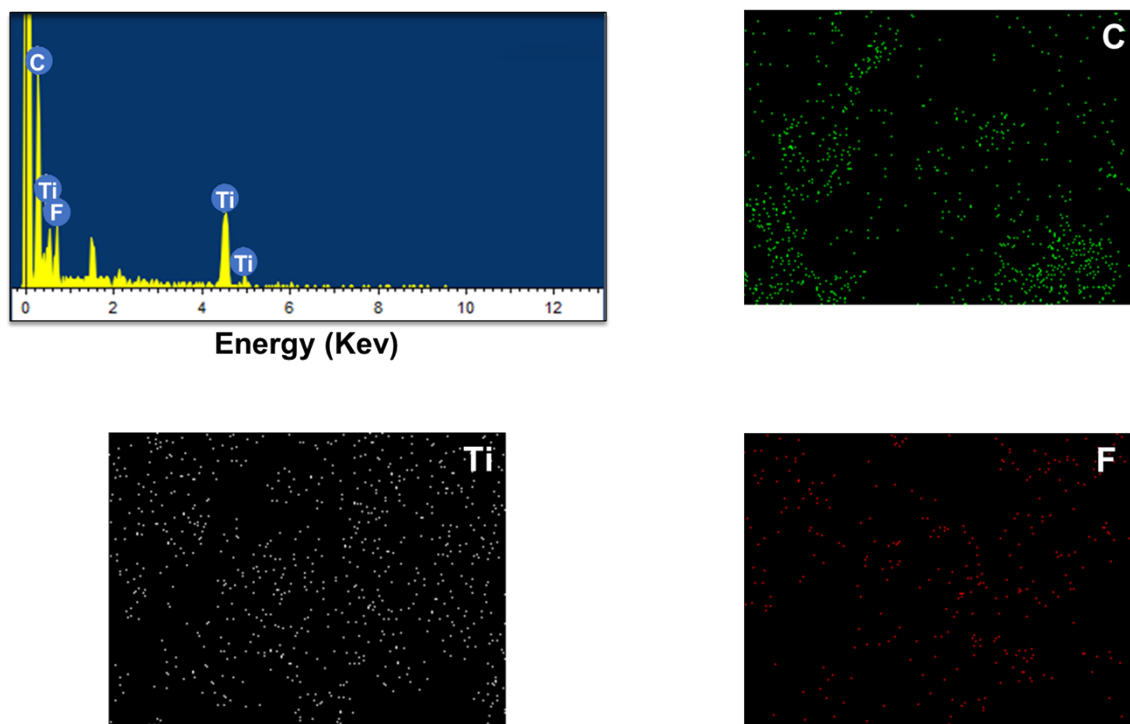

**Fig. S1** The images of EDX spectrum and elemental mapping show the existence of elements (such as C, Ti and F) in MXene.

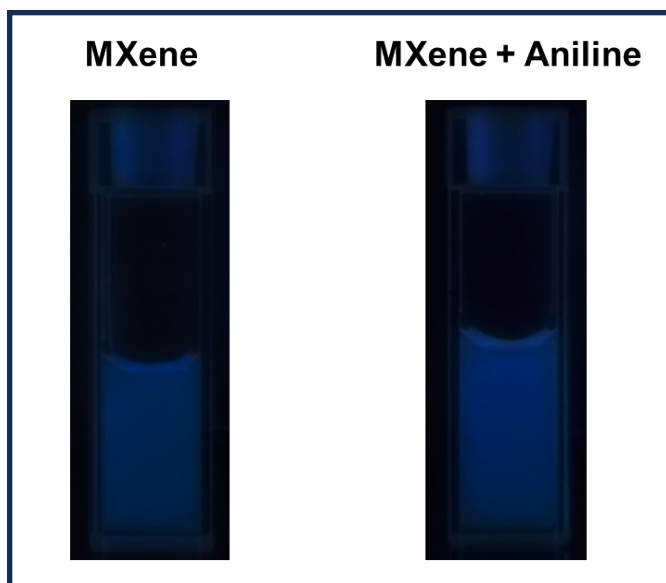

**Fig. S2** Fluorescence digital images of MQDs synthesized from MXene (left side) and MXene+Aniline (right side) at 150 °C for 14 h.

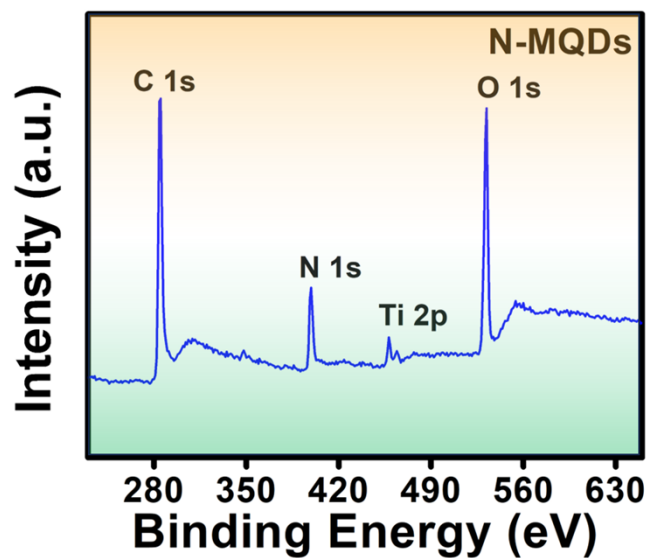

**Fig. S3** XPS survey spectrum of N-MQDs.

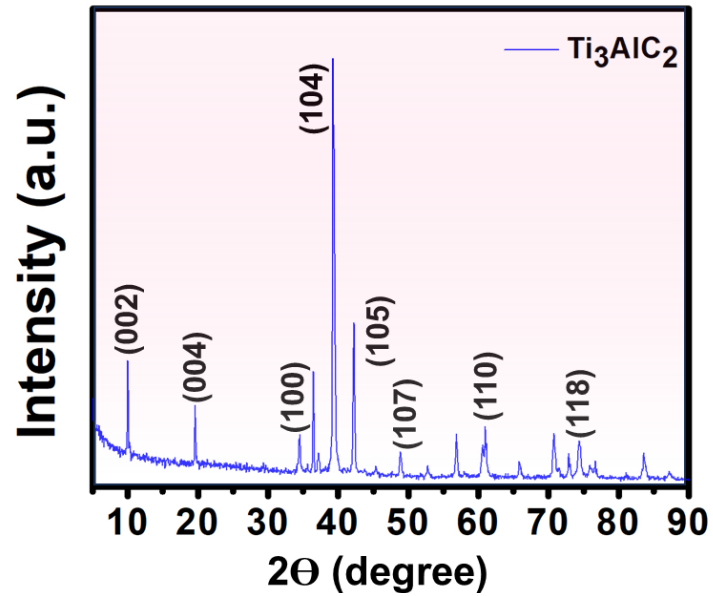

Fig. S4 XRD spectrum of bulk  $\text{Ti}_3\text{AlC}_2$ .

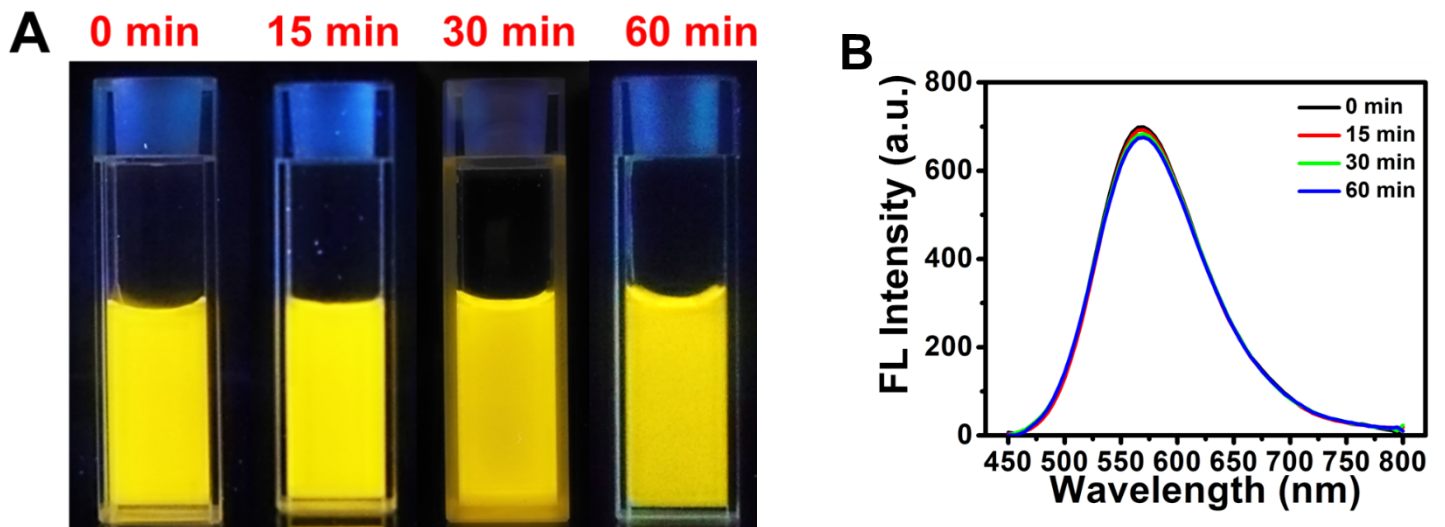

Fig. S5 Photobleaching study of N-MQDs. (A) Fluorescence digital images and (B) emission spectra of N-MQDs at various times.

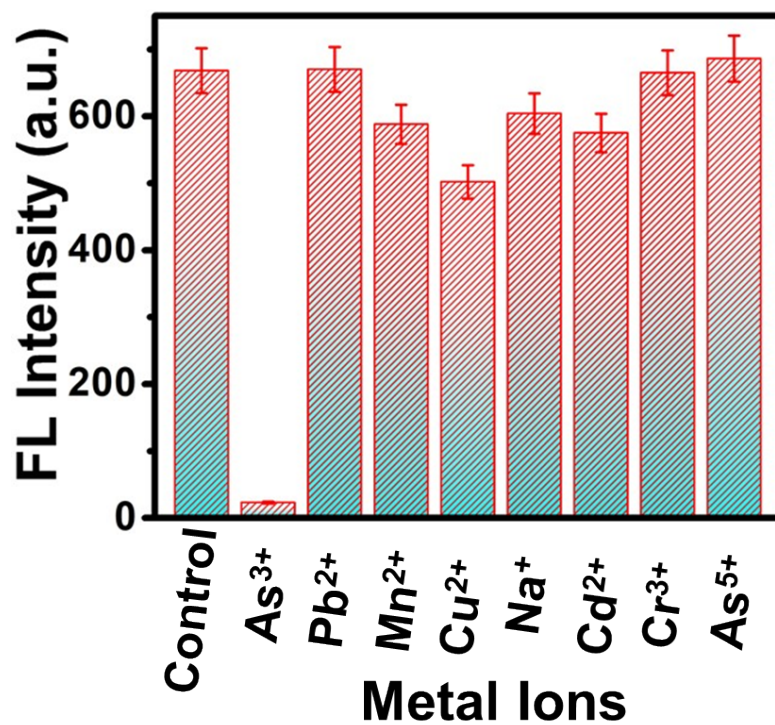

**Fig. S6** Fluorescence intensity of N-MQDs after incubation with different metal ions.

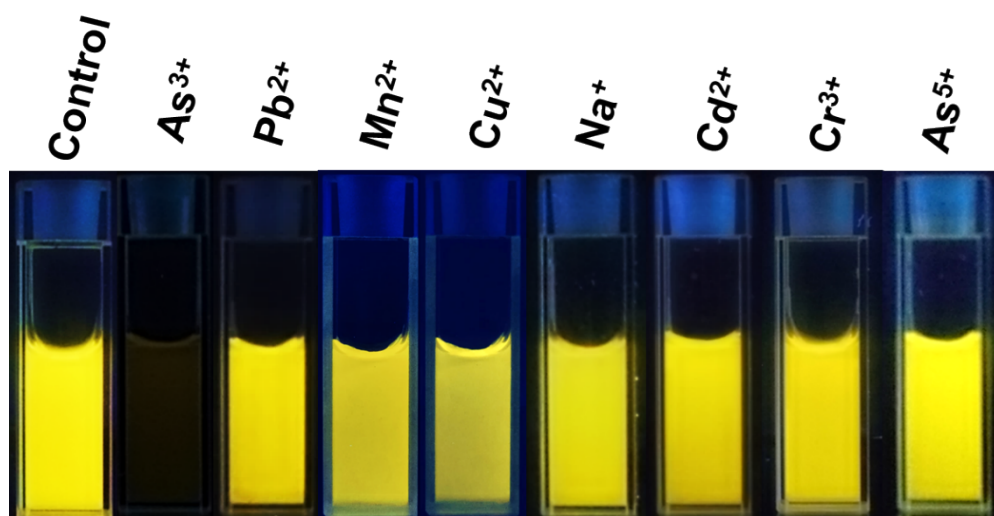

**Fig. S7** Fluorescence digital images of N-MQDs after incubation with the mentioned metal ions.

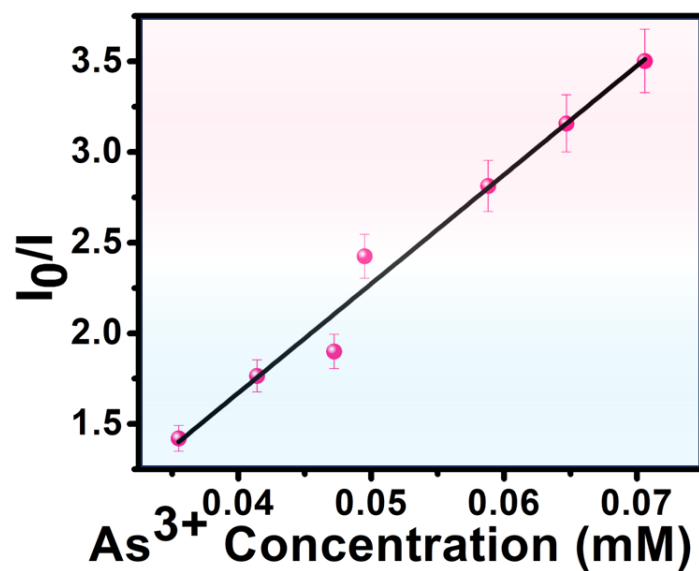

**Fig. S8** Linear plot  $I_0/I$  versus concentration of  $As^{3+}$  ion.

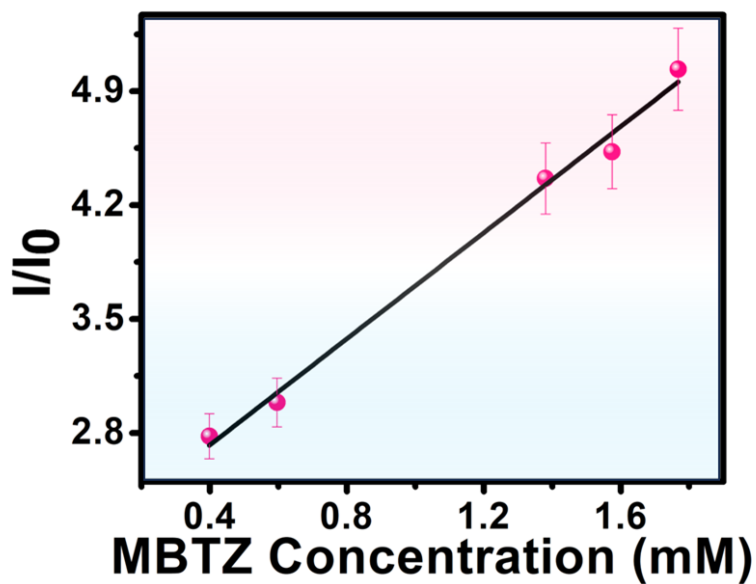

**Fig. S9** Linear plot  $I/I_0$  versus concentration of MBTZ.

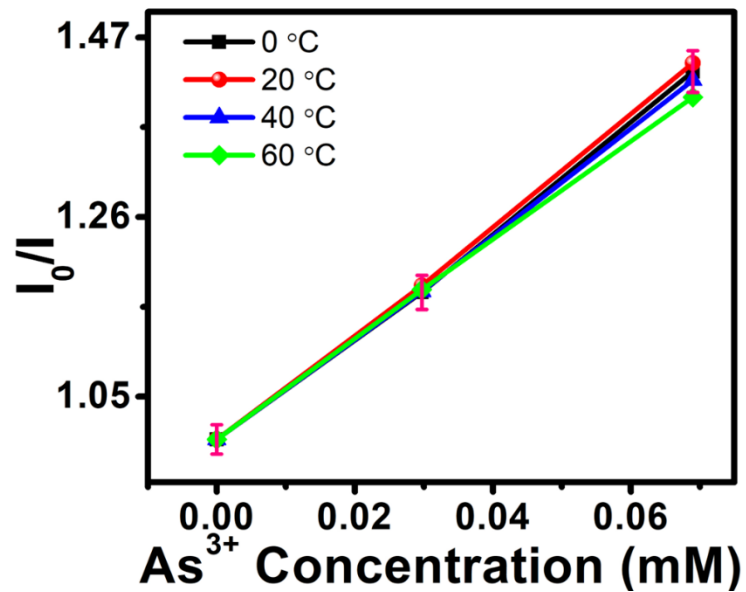

Fig. S10 Stern-Volmer curves at different temperatures ranging between 0 °C and 60 °C.

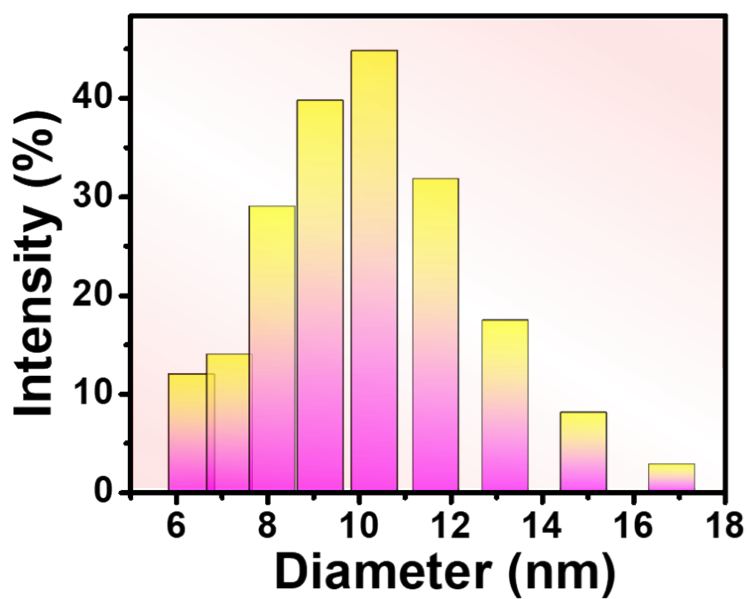

Fig. S11 DLS measurement of N-MQDs.

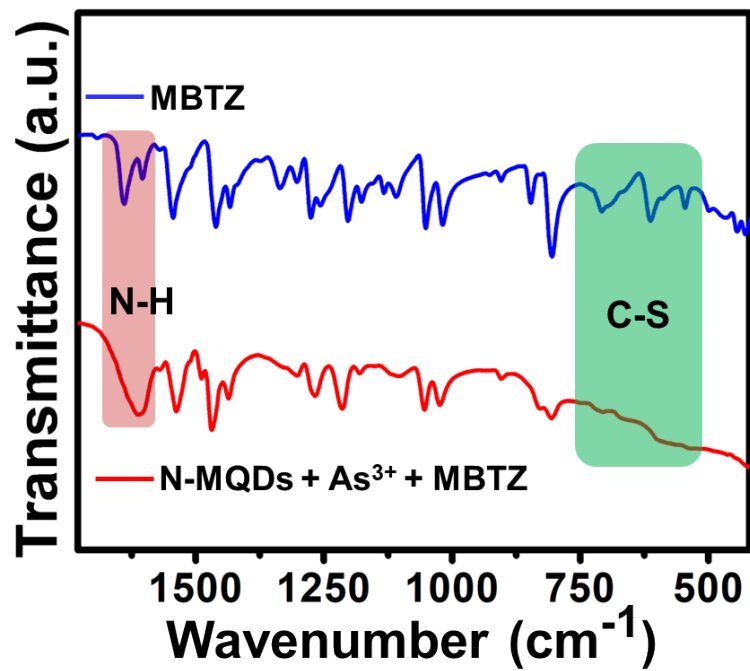

**Fig. S12** FTIR spectra of MBTZ before and after addition with N-MQDs + As<sup>3+</sup> system.
